## Correction: Dietary cholesterol intake and stroke risk: a meta-analysis

**Pengfei Cheng<sup>1,2,3,4,\*</sup>, Junxi Pan<sup>2,3,5,\*</sup>, Jinjun Xia<sup>2,3,5,\*</sup>, Wen Huang<sup>6</sup>, Shunjie Bai<sup>2,3,5</sup>, Xiaofeng Zhu<sup>7</sup>, Weihua Shao<sup>8</sup>, Haiyang Wang<sup>2,3</sup> and Peng Xie<sup>1,2,3</sup>**

<sup>1</sup> Department of Neurology, The First Affiliated Hospital of Chongqing Medical University, Chongqing, 400016, China

<sup>2</sup> Chongqing Key Laboratory of Neurobiology, Chongqing, 400016, China

<sup>3</sup> Institute of Neuroscience and The Collaborative Innovation Center for Brain Science, Chongqing Medical University, Chongqing, 400016, China

<sup>4</sup> Department of Neurology, The First Affiliated Hospital of Jiamusi University, Jiamusi, Heilongjiang Province, 154002, China

<sup>5</sup> The M.O.E. Key Laboratory of Laboratory Medical Diagnostics, The College of Laboratory Medicine, Chongqing Medical University, Chongqing, 400016, China

<sup>6</sup> Department of Neurology, Xinqiao Hospital, Third Military Medical University, Chongqing 400037, China

<sup>7</sup> Institute of Neuroscience, Jiamusi University, Jiamusi, Heilongjiang Province, 154002, China

<sup>8</sup> Department of Respiratory Medicine, The First Affiliated Hospital, Chongqing Medical University, Chongqing, 400016, China

\* These authors contributed equally to this work

**Published:** June 12, 2018

**Copyright:** Cheng et al. This is an open-access article distributed under the terms of the Creative Commons Attribution License 3.0 (CC BY 3.0), which permits unrestricted use, distribution, and reproduction in any medium, provided the original author and source are credited.

**This article has been corrected:** The correct author information is given below:

**Pengfei Cheng<sup>1,2,3,4,\*</sup>, Junxi Pan<sup>2,3,5,\*</sup>, Jinjun Xia<sup>2,3,5,\*</sup>, Wen Huang<sup>6</sup>, Shunjie Bai<sup>2,3,5</sup>, Xiaofeng Zhu<sup>7</sup>, Weihua Shao<sup>8</sup>, Haiyang Wang<sup>2,3</sup> and Peng Xie<sup>1,2,3</sup>**

Original article: Oncotarget. 2018; 9:25698-25707. <https://doi.org/10.18632/oncotarget.23933>
